*In Reply:*

As investigators who are interested in the design and implementation of clinical trials, the divulging of disclosures has become nearly universally recognized as necessary. Therefore, we initiate our response to the questions raised by Manchikanti *et al.* by disclosing the fact that we fully expected their group to raise questions with our published article.<sup>1</sup> During the past 5 yr, Dr. Manchikanti's group has furnished insightful commentary on nearly all of our published work, especially our clinical trials, usually citing divergent work from their own publications.

The authors are correct in stating that we did not include one of their randomized studies evaluating cervical epidural steroid injections (ESIs) as a treatment for radiculopathy in the introduction.<sup>2</sup> What distinguishes their study from the other two we cited<sup>3,4</sup> is that it was designed and promoted as a comparative-effectiveness study evaluating two different treatments rather than a placebo-controlled study. Their results in this study were almost identical to the results of the plenitude of studies they have published on ESI with the same exact study design.<sup>5</sup> Although this may not seem like a major point, the manner in which a study is billed and presented to patients is likely to exert an enormous effect on treatment outcomes because expectations play a major role in the placebo effect,<sup>6</sup> and the placebo effect probably comprises a majority of the treatment effect for pain interventions (*i.e.*, the average placebo response is greater than the difference between the active treatment and placebo in most clinical trials).<sup>7</sup> It is therefore likely that the greater and longer-lasting results in the studies performed by Manchikanti *et al.* compared with other investigators are to a large extent attributable to their study design and patient population.<sup>8,9</sup>

Manchikanti *et al.* go on to state that there is minimal benefit from using physical therapy and pharmacotherapy as stand-alone therapies. The results of studies evaluating pharmacotherapy and physical therapy for radiculopathy have indeed yielded mixed results,<sup>10–14</sup> just as studies evaluating ESI have demonstrated conflicting findings.<sup>8,9</sup> This likely indicates a small treatment effect size. We should also point out that in this multicenter study, the results of conservative treatment and ESI as stand-alone treatments were statistically comparable and that our decision to include three treatment groups was meant to reflect the real-world decisions faced by primary care providers. Many insurance companies will not even pay for spinal injections unless attempts at pharmacotherapy and physical therapy have been exhausted.

We were surprised that Manchikanti *et al.* seem to have misinterpreted the findings of a previous meta-analysis we performed.<sup>5</sup> They wrote that we previously demonstrated that epidurally injected “nonsteroid solutions may be superior to steroid solutions,” whereas the conclusions of this review clearly state that “epidural nonsteroid solutions may provide improved benefit compared to nonepidural

injections....” In fact, if one were to remove all of the studies by Manchikanti *et al.* from our analysis,<sup>5</sup> because they all point in the same direction, our conclusions might have been different.

Finally, the authors criticize our decision to not use local anesthetic in our ESI group. The results of Bicket *et al.*'s<sup>5</sup> and other systematic reviews suggest that it is not the local anesthetic *per se*, but rather the volume of injectate, that leads to better treatment outcomes.<sup>15</sup> The goal of comparative-effectiveness research is to determine which treatment is more effective for patients in routine clinical practice; hence, the selection criteria should be liberal, and the design should reflect real-life circumstances.<sup>16</sup> In a study conducted 15 yr ago evaluating common practices for ESIs, Cluff *et al.*<sup>17</sup> found that almost half of the academic centers did not administer local anesthetic during cervical ESI, mostly as a risk-mitigation strategy. In light of the concern over complications resulting from cervical ESI, this percentage has probably increased.

In summary, although we appreciate the time they took to write this letter (as well as a few of their insightful comments), Manchikanti *et al.* appeared to have missed the point on many of their criticisms.

### Competing Interests

The authors declare no competing interests.

**Steven P. Cohen, M.D., Salim Hayek, M.D., Ph.D., Paul F. Pasquina, M.D., Yakov Vorobeychik, M.D., Ph.D.**  
Johns Hopkins School of Medicine, Baltimore, Maryland (S.P.C.). scohen40@jhmi.edu

### References

1. Cohen SP, Hayek S, Semenov Y, Pasquina PF, White RL, Veizi E, Huang JH, Kurihara C, Zhao Z, Guthmiller KB, Griffith SR, Verdun AV, Giampetro DM, Vorobeychik Y: Epidural steroid injections, conservative treatment, or combination treatment for cervical radicular pain: A multicenter, randomized, comparative-effectiveness study. *ANESTHESIOLOGY* 2014; 121:1045–55
2. Manchikanti L, Singh V, Cash KA, Pampati V, Damron KS, Boswell MV: A randomized, controlled, double-blind trial of fluoroscopic caudal epidural injections in the treatment of lumbar disc herniation and radiculitis. *Spine (Phila Pa 1976)* 2011; 36:1897–905
3. Stav A, Ovadia L, Sternberg A, Kaadan M, Weksler N: Cervical epidural steroid injection for cervicobrachialgia. *Acta Anaesthesiol Scand* 1993; 37:562–6
4. Anderberg L, Annertz M, Persson L, Brandt L, Säveland H: Transforaminal steroid injections for the treatment of cervical radiculopathy: A prospective and randomised study. *Eur Spine J* 2007; 16:321–8
5. Bicket MC, Gupta A, Brown CH IV, Cohen SP: Epidural injections for spinal pain: A systematic review and meta-analysis evaluating the “control” injections in randomized controlled trials. *ANESTHESIOLOGY* 2013; 119:907–31
6. Enck P, Bingel U, Schedlowski M, Rief W: The placebo response in medicine: Minimize, maximize or personalize? *Nat Rev Drug Discov* 2013; 12:191–204
7. Macedo A, Baños JE, Farré M: Placebo response in the prophylaxis of migraine: A meta-analysis. *Eur J Pain* 2008; 12:68–75

8. Cohen SP, Bicket MC, Jamison D, Wilkinson I, Rathmell JP: Epidural steroids: A comprehensive, evidence-based review. *Reg Anesth Pain Med* 2013; 38:175–200
9. Pinto RZ, Maher CG, Ferreira ML, Hancock M, Oliveira VC, McLachlan AJ, Koes B, Ferreira PH: Epidural corticosteroid injections in the management of sciatica: A systematic review and meta-analysis. *Ann Intern Med* 2012; 157:865–77
10. McCleane GJ: Does gabapentin have an analgesic effect on background, movement and referred pain? A randomized, double-blind, placebo controlled study. *Pain Clin* 2001; 13:103–7
11. Yildirim K, Sisecioglu M, Karatay S, Erdal A, Levent A, Ugur M, Senel K: The effectiveness of gabapentin in patients with chronic radiculopathy. *Pain Clin* 2003; 15:213–8
12. Khoromi S, Cui L, Nackers L, Max MB: Morphine, nortriptyline and their combination *vs.* placebo in patients with chronic lumbar root pain. *Pain* 2007; 130:66–75
13. Salt E, Wright C, Kelly S, Dean A: A systematic literature review on the effectiveness of non-invasive therapy for cervicobrachial pain. *Man Ther* 2011; 16:53–65
14. Kuijper B, Tans JT, Beelen A, Nollet F, de Visser M: Cervical collar or physiotherapy *versus* wait and see policy for recent onset cervical radiculopathy: Randomised trial. *BMJ* 2009; 339:b3883
15. Rabinovitch DL, Peliowski A, Furlan AD: Influence of lumbar epidural injection volume on pain relief for radicular leg pain and/or low back pain. *Spine J* 2009; 9:509–17
16. Brouwers MC, Thabane L, Moher D, Straus SE: Comparative effectiveness research paradigm: Implications for systematic reviews and clinical practice guidelines. *J Clin Oncol* 2012; 30:4202–7
17. Cluff R, Mehio AK, Cohen SP, Chang Y, Sang CN, Stojanovic MP: The technical aspects of epidural steroid injections: A national survey. *Anesth Analg* 2002; 95:403–8

(Accepted for publication February 21, 2015.)
